# Supplementary material for: Nanostructured BiVO4 obtained by the vanadium calcination of Bi2O3 nanohelixes for enhanced photoelectrochemical water splitting
Source: Royal Society of Chemistry journal article supplement (doi:10.1039/d3ta02056h), 2023-01-01
Supplement: d3ta02056h1.pdf [file d3ta02056h1.pdf]

## Supporting Information

### **Nanostructured BiVO<sub>4</sub> obtained from vanadium calcination of nanohelices Bi<sub>2</sub>O<sub>3</sub> for enhanced photoelectrochemical water splitting**

*Sucheol Ju,<sup>a‡</sup> Noho Lee,<sup>b‡</sup> Hansang Sung,<sup>a‡</sup> Soomin Son,<sup>a</sup> Nakhyun Kim,<sup>a</sup> Jaerim Kim,<sup>b</sup> Jongkyu Kim,<sup>\*b</sup> and Heon Lee<sup>\*a,c</sup>*

<sup>‡</sup>. Sucheol Ju, Noho Lee, and Hansang Sung contributed equally to this work.

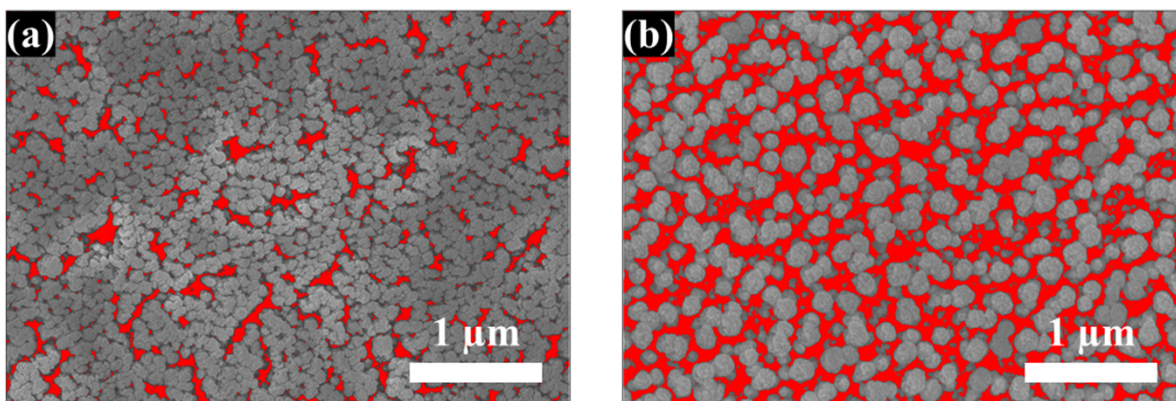

**Figure S1.** The calculation of the  $\text{Bi}_2\text{O}_3$  nanohelix coverage using ImageJ software: (a) BO-80 and (b) BO-85.

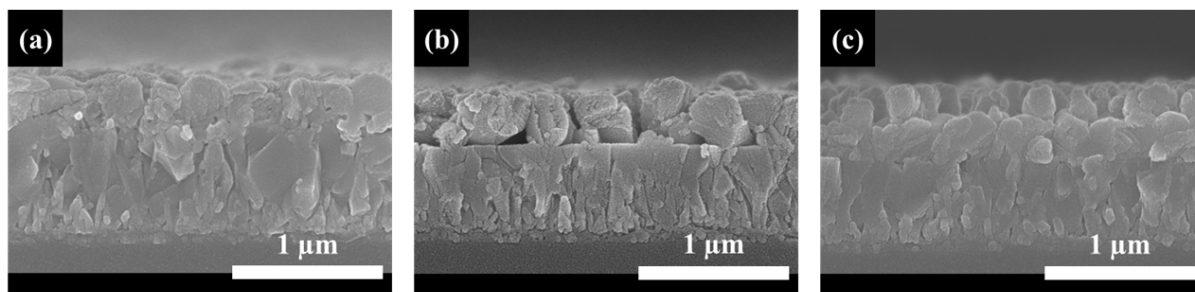

**Figure S2.** Scanning electron microscopy (SEM) images of (a) BVO-0, (b) BVO-80, and (c) BVO-85.

**Table S1.** Surface area and surface area ratio of BVO-0, BVO-80, and BVO-85 measured by atomic force microscopy (AFM; surface area of 9.0  $\mu\text{m}^2$ ).

|                                                  | <b>BVO-0</b> | <b>BVO-80</b> | <b>BVO-85</b> |
|--------------------------------------------------|--------------|---------------|---------------|
| <b>Surface area (<math>\mu\text{m}^2</math>)</b> | 10.9         | 12.0          | 19.9          |
| <b>Surface area ratio (%)</b>                    | 21.1         | 33.5          | 121.6         |

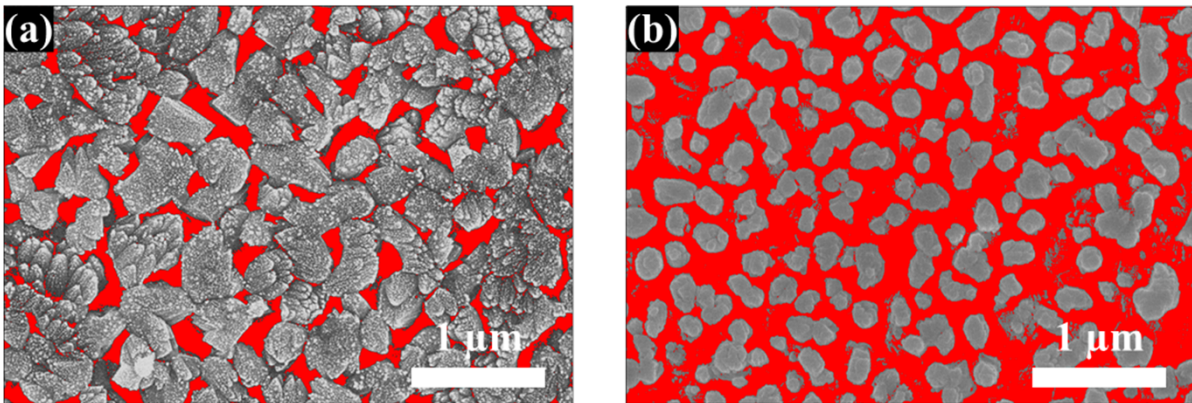

**Figure S3.** The calculation of the porosity using ImageJ software: (a) BVO-80 and (b) BVO-85.

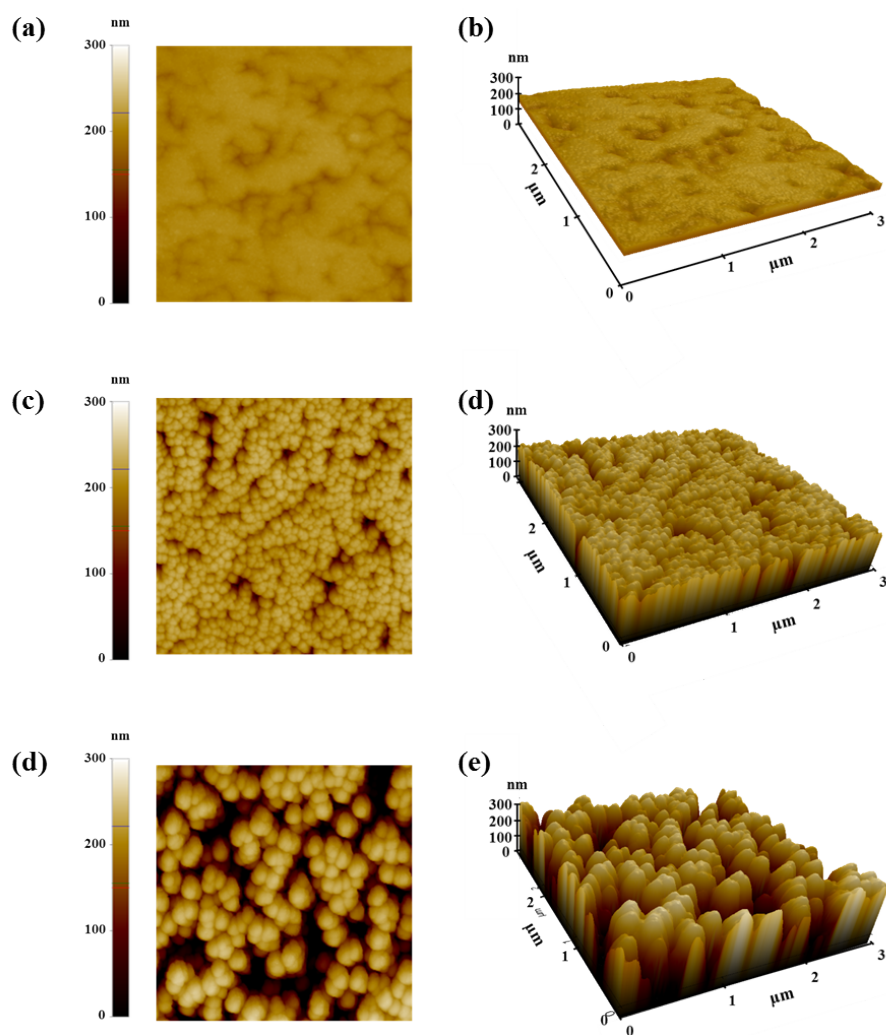

**Figure S4.** The respective two- and three-dimensional AFM images of (a, b) BO-0, (c, d) BO-80, and (d, e) BO-85.

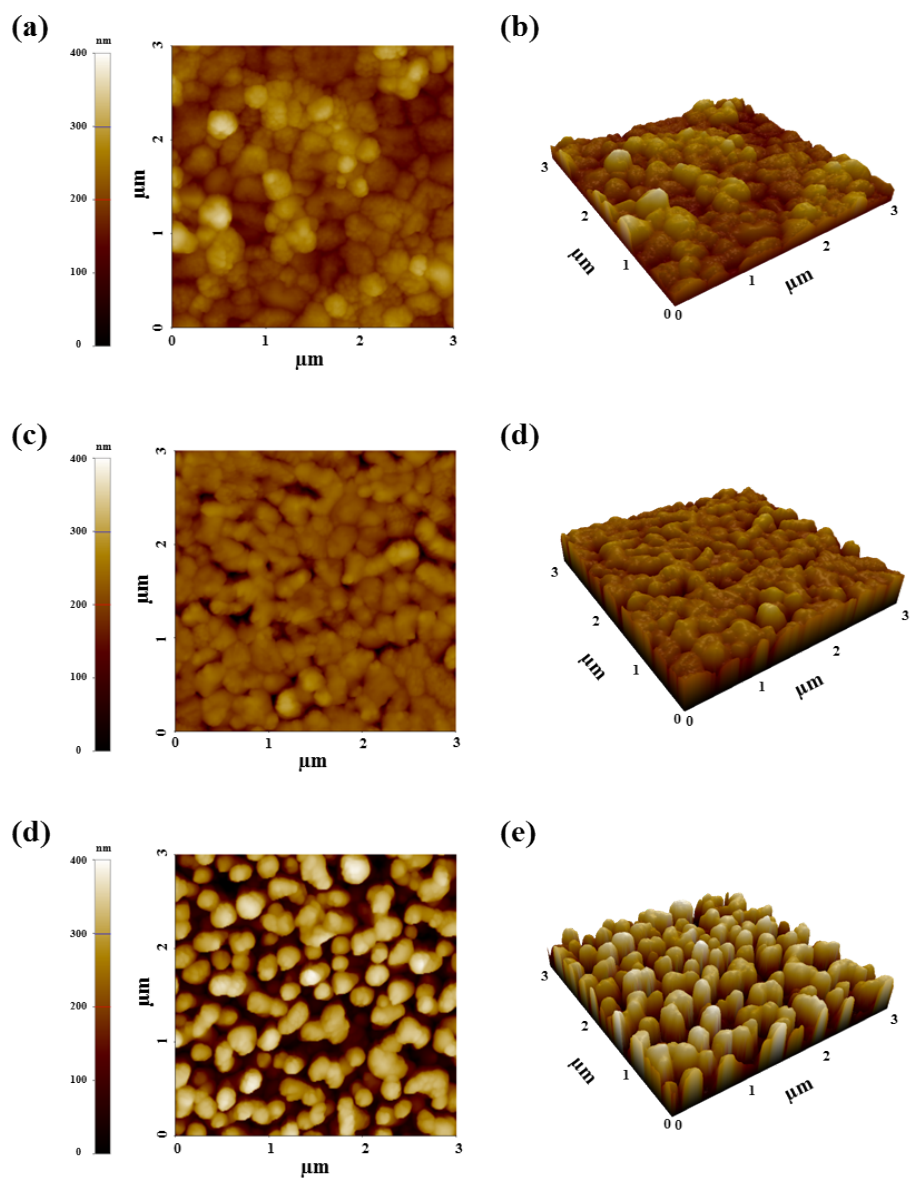

**Figure S5.** The respective two- and three-dimensional AFM images of (a, b) BVO-0, (c, d) BVO-80, and (e, f) BVO-85.

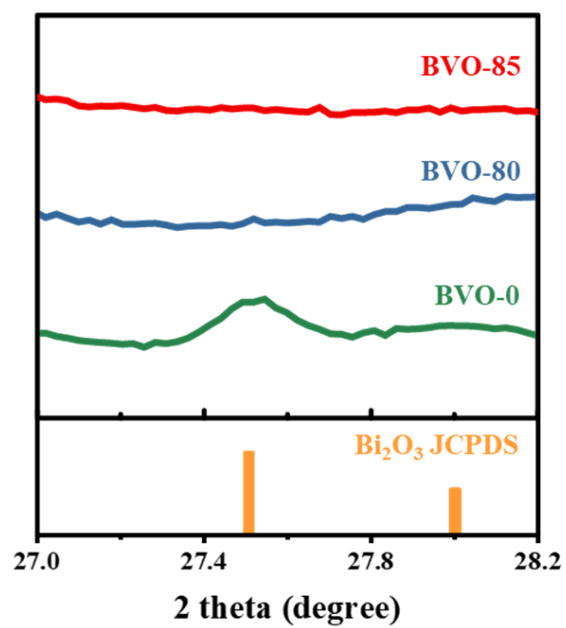

**Figure S6.** The narrow-scan X-ray diffraction (XRD) spectra of BVO-0, BVO-80, and BVO-85.



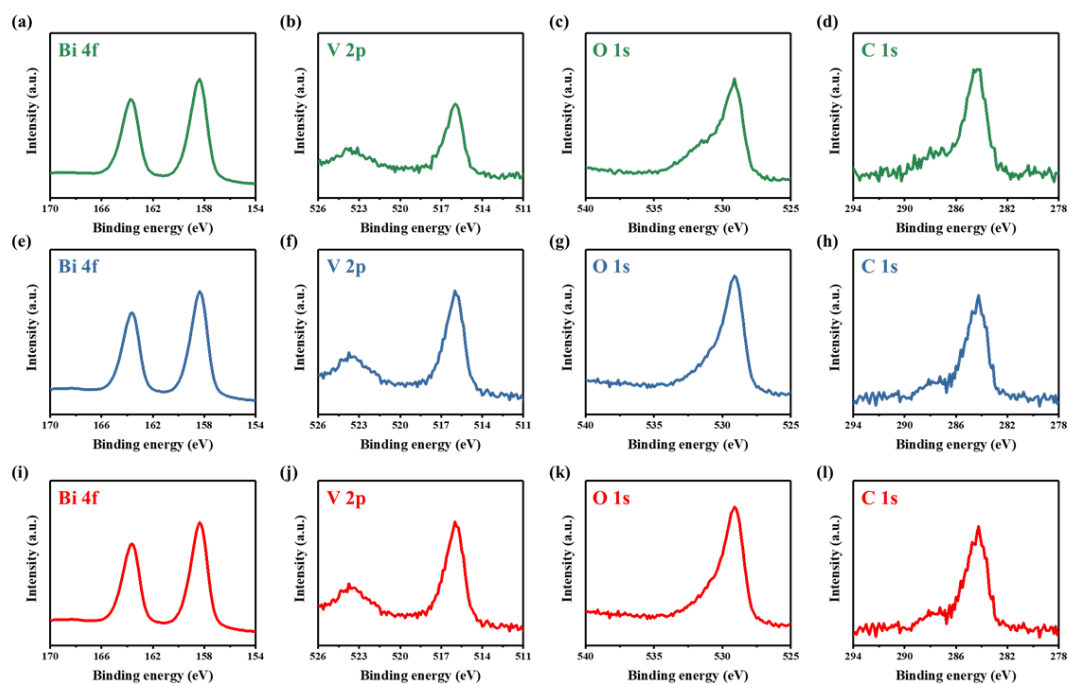

**Figure S7.** The narrow-scan X-ray photoelectron spectroscopy (XPS) results for (a–d) BVO-0, (e–h) BVO-80, and (i–l) BVO-85.

X-ray photoelectron spectroscopy was conducted to confirm the surface chemical states and compositions. Figures S4 presents the narrow-scan XPS spectra of Bi, V, and O for the three samples. The binding energies at 164.08 and 158.77 eV correspond to Bi  $4f_{5/2}$  and  $4f_{7/2}$  (Figures S4a, S4e, and S4i), respectively; whereas those at 524.08 and 516.25 eV correspond to V  $2p_{1/2}$  and  $2p_{3/2}$  (Figures S4b, S4f, and S4j), respectively. Figures S4c, S4g, and S4k present the binding energies of the oxygen vacancy ( $O_{\text{vac}}$ ; 532.04 eV) and oxygen lattice ( $O_{\text{lat}}$ ; 529.43 eV).

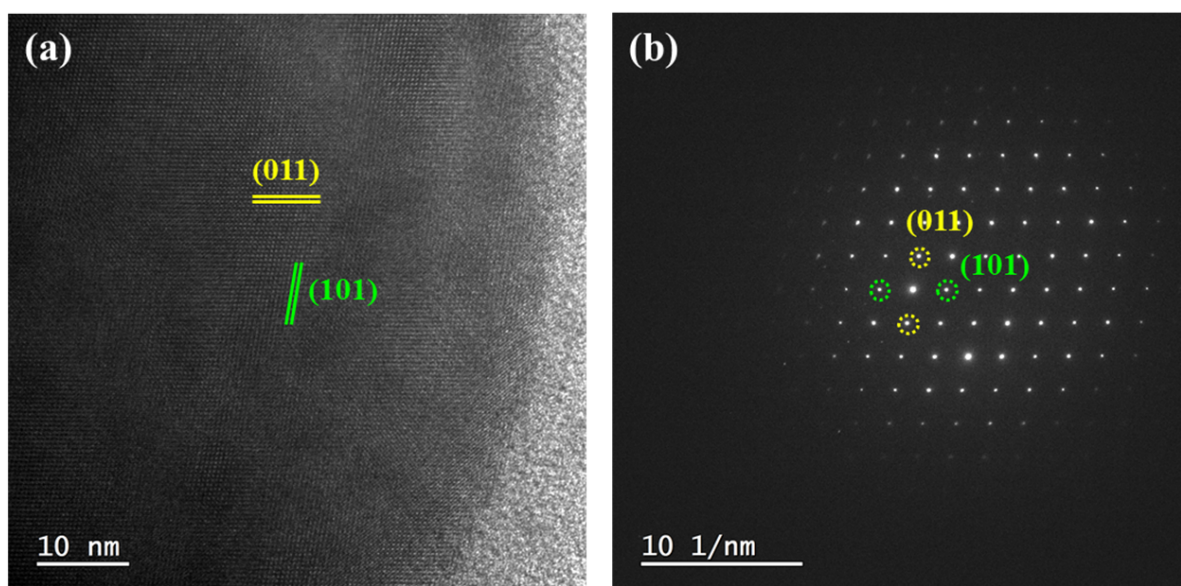

**Figure S8.** (a) High-resolution transmission electron image (TEM) and (b) fast Fourier transform (FFT) image of BVO.

The crystallinity of  $\text{BiVO}_4$  was determined using transmission electron microscopy (TEM), as shown in Figure S5. The high-resolution TEM and FFT images present the monoclinic  $\text{BiVO}_4$  lattice spaces of 0.474 and 0.493 nm, which correspond to the (011) and (101) facets, respectively.

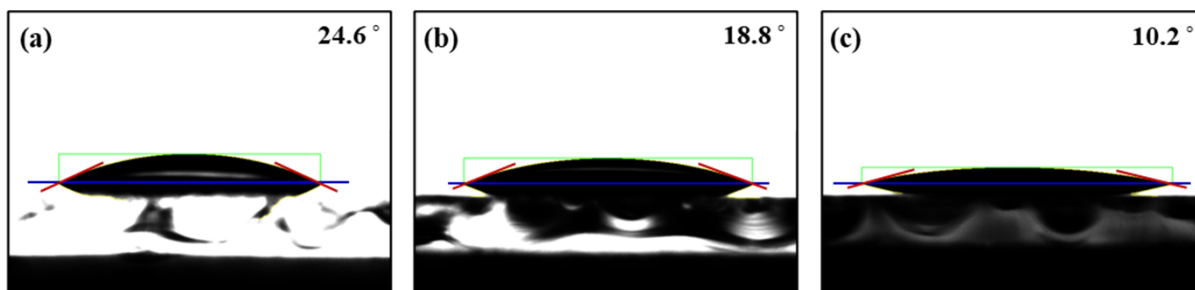

**Figure S9.** Contact angles between the V precursor and (a) BO-0, (b) BO-80, and (c) BO-85.



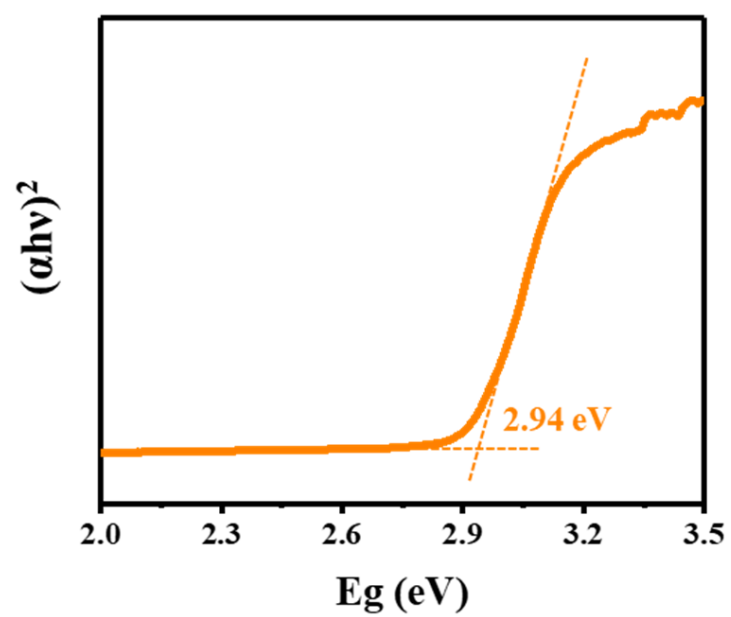

**Figure S10.** The Tauc plot for the deposited  $\text{Bi}_2\text{O}_3$  based on UV-Vis spectroscopy.

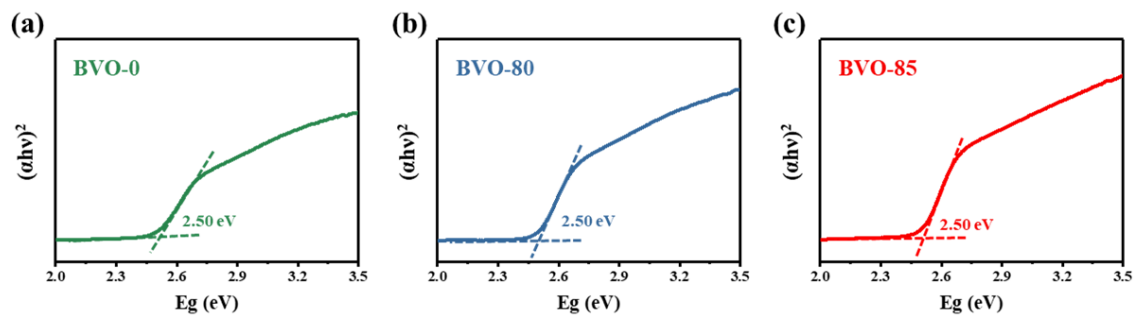

**Figure S11.** The Tauc plot for (a) BVO-0, (b) BVO-80, and (c) BVO-85 based on UV–Vis spectroscopy.

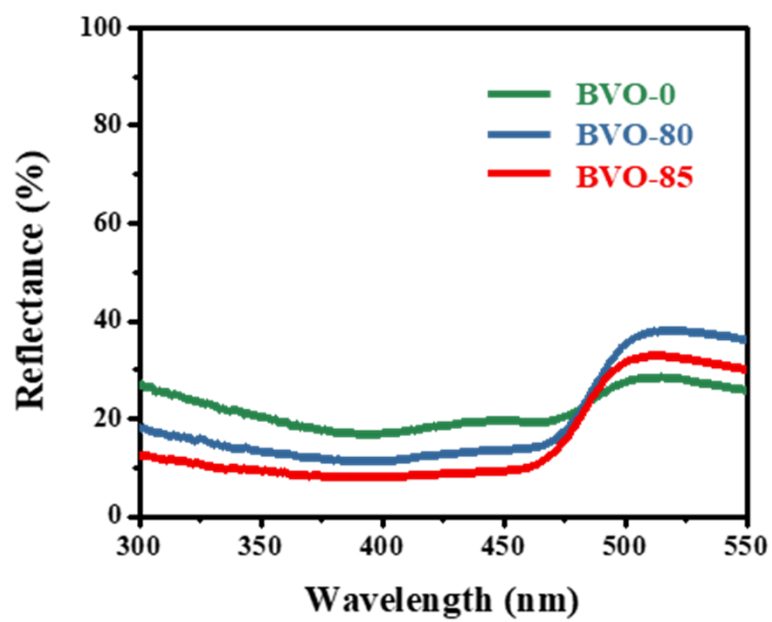

**Figure S12.** The reflectance graph of BVO-0, BVO-80, and BVO-85, as determined by UV–Vis with an integrating sphere.

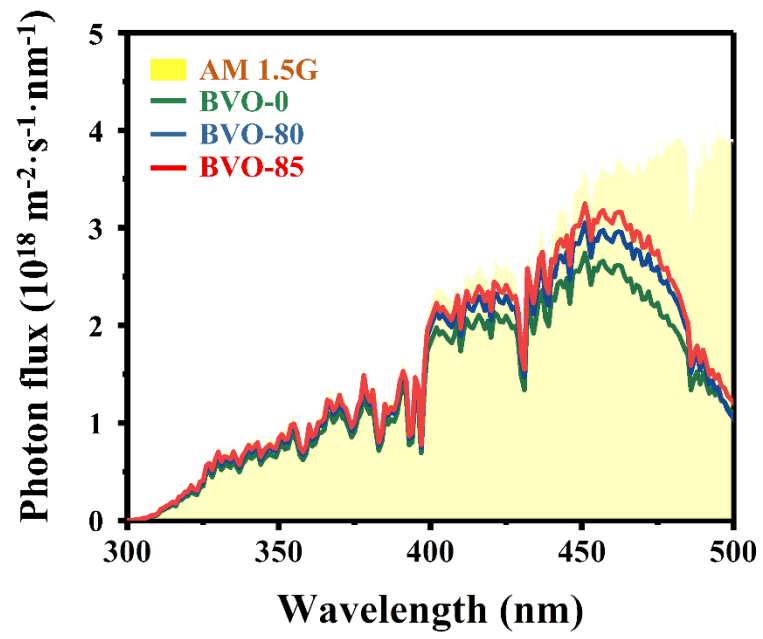

**Figure S13.** Photon flux of the AM 1.5 G solar spectrum, BVO-F, BVO-MP1, and BVO-MP2.



**Table S2.** The  $J_{abs}$  and  $\eta_{abs}$  values of BVO-0, BVO-80, and BVO-85

|                                  | <b>BVO-0</b> | <b>BVO-80</b> | <b>BVO-85</b> |
|----------------------------------|--------------|---------------|---------------|
| $J_{abs}$ (mA·cm <sup>-2</sup> ) | 4.29         | 4.76          | 5.01          |
| $\eta_{abs}$ (%)                 | 69.2         | 76.7          | 80.8          |

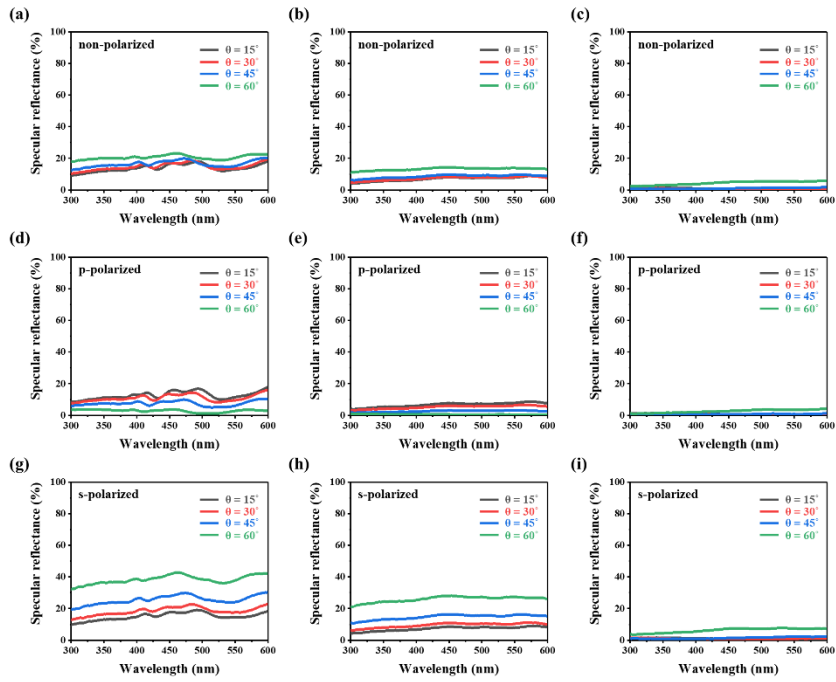

**Figure S14.** The non-polarized specular reflectance graph of (a) BVO-0, (b) BVO-80, and (c) BVO-85. The p-polarized specular reflectance graph of (d) BVO-0, (e) BVO-80, and (f) BVO-85. The s-polarized specular reflectance graph of (g) BVO-0, (h) BVO-80, (i) BVO-85.

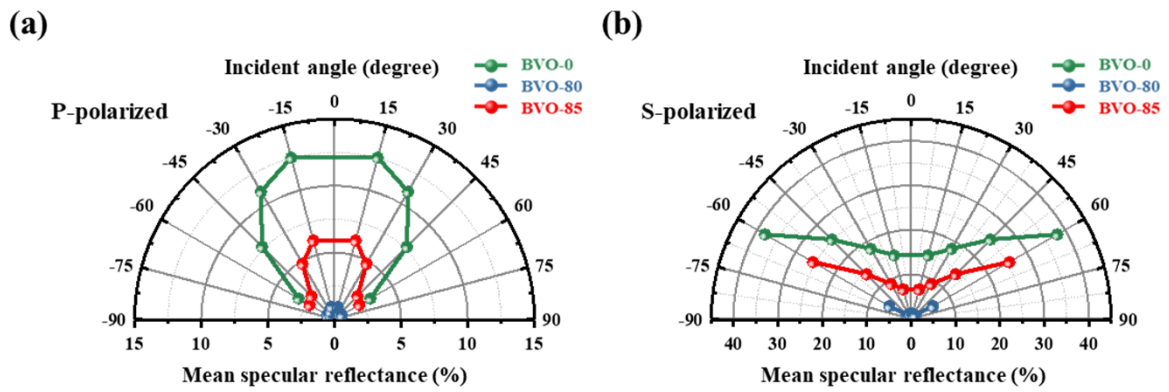

**Figure S15.** Mean angle-dependent specular reflectance of (a) p-polarized light and (b) s-polarized light for BVO-0, BVO-80, and BVO-85.

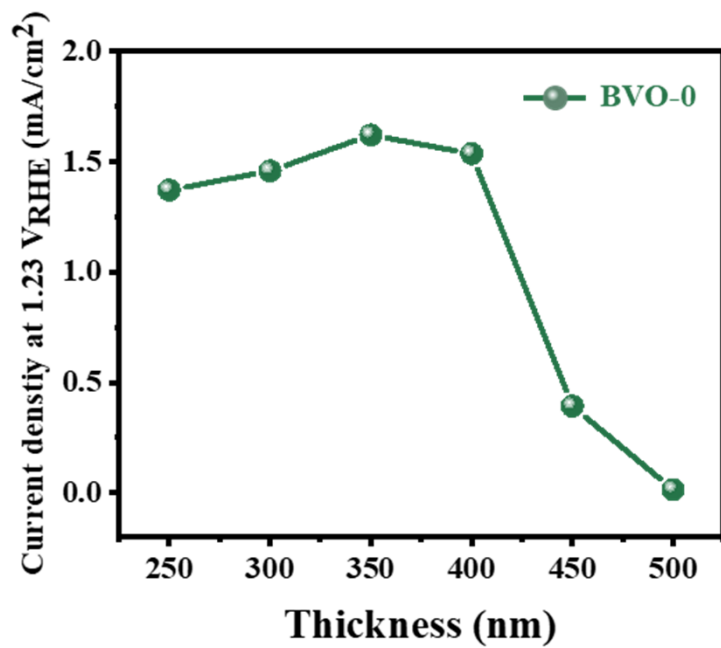

**Figure S16.** Current density of BVO-0 for difference thickness of BiVO<sub>4</sub> in a 0.5 M phosphate buffer solution under AM 1.5G illumination at 1.23 V<sub>RHE</sub>.

**Table S3.** Comparison of the photocurrent densities with those of BiVO<sub>4</sub> photoanode studies fabricated by e-beam evaporation.

| <b>Reference</b> | <b>Structure</b>                 | <b>Fabrication method</b>                                                                              | <b>Current density at<br/>1.23 V<sub>RHE</sub> (bare<br/>BiVO<sub>4</sub>)</b> |
|------------------|----------------------------------|--------------------------------------------------------------------------------------------------------|--------------------------------------------------------------------------------|
| This work        | Flat BiVO <sub>4</sub>           | Bi <sub>2</sub> O <sub>3</sub> source deposited with e-beam evaporator and V calcination               | 1.61 mA/cm <sup>2</sup>                                                        |
| This work        | Nanostructured BiVO <sub>4</sub> | Bi <sub>2</sub> O <sub>3</sub> source oblique angle deposited with e-beam evaporator and V calcination | 2.60 mA/cm <sup>2</sup>                                                        |
| 35               | Flat BiVO <sub>4</sub>           | BiVO <sub>4</sub> source deposited with e-beam evaporator                                              | ~1 mA/cm <sup>2</sup>                                                          |
| 36               | Nanostructured BiVO <sub>4</sub> | BiVO <sub>4</sub> source deposited with e-beam evaporator                                              | 0.3 mA/cm <sup>2</sup>                                                         |

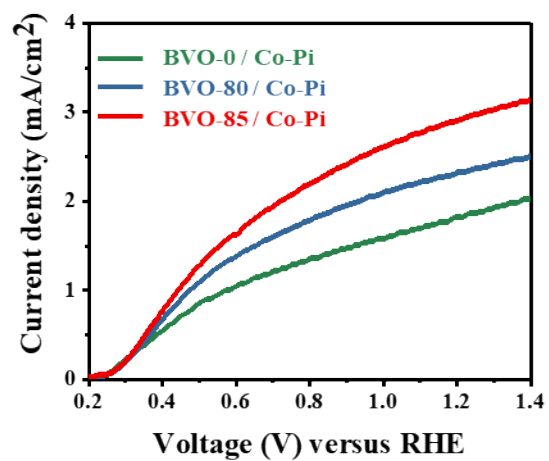

**Figure S17.** Linear sweep voltammetry (LSV) curve for BVO-0 / Co-Pi, BVO-80 / Co-Pi, / BVO-85 / Co-Pi measured in a 0.5 M phosphate buffer solution under 1-sun illumination.

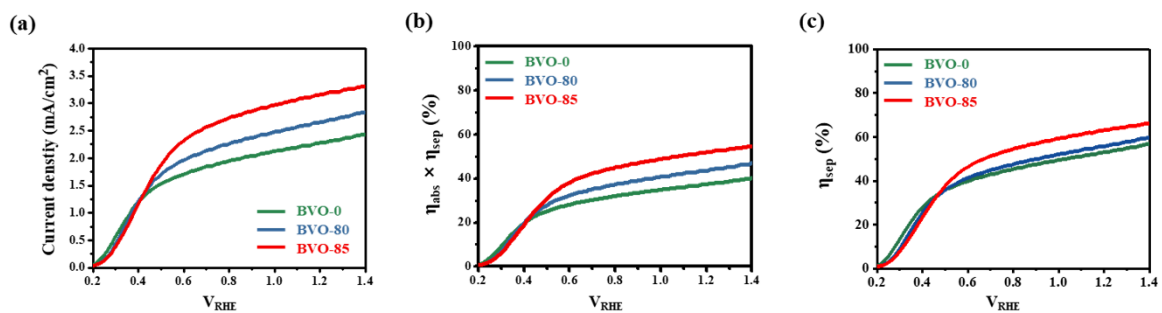

**Figure S18.** (a) Linear sweep voltammetry (LSV) curve measured in a 0.5 M phosphate buffer solution containing 0.5 M Na<sub>2</sub>SO<sub>3</sub>. Calculated values of (b)  $\eta_{abs} \times \eta_{sep}$  and (c)  $\eta_{sep}$  for BVO-0, BVO-80, and BVO-85.

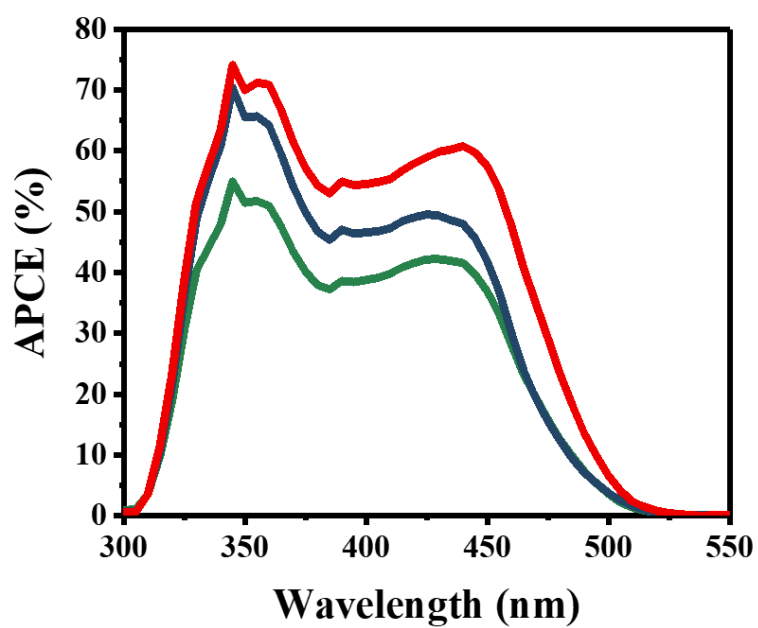

**Figure S19.** Absorbed photon-to-current efficiency (APCE) measured in a 0.5-M phosphate buffer solution at 1.23  $V_{\text{RHE}}$ .



**Table S4.** Nyquist plot fitting results for BVO-0, BVO-80, and BVO-85

|                           | <b>BVO-0</b> | <b>BVO-80</b> | <b>BVO-85</b> |
|---------------------------|--------------|---------------|---------------|
| <b>R<sub>s</sub> (Ω)</b>  | 70.2         | 93.7          | 86.8          |
| <b>R<sub>ct</sub> (Ω)</b> | 4800         | 4408          | 3252          |

**Table S5.** The calculated values of  $\eta_{abs} \times \eta_{sep}$  and  $\eta_{sep}$  for BVO-0, BVO-80, and BVO-85.

|                                    | <b>BVO-0</b> | <b>BVO-80</b> | <b>BVO-85</b> |
|------------------------------------|--------------|---------------|---------------|
| $\eta_{abs} \times \eta_{sep}$ (%) | 37.1         | 43.4          | 51.4          |
| $\eta_{sep}$ (%)                   | 53.6         | 56.5          | 63.7          |
